1 **Identification of epigenome-wide DNA methylation differences between carriers of *APOE*  $\epsilon$ 4 and**

2 ***APOE*  $\epsilon$ 2**

3 **Authors**

4 Rosie M. Walker<sup>a,1\*</sup>, Kadi Vaher<sup>a,2</sup>, Mairead L. Bermingham<sup>a</sup>, Stewart W. Morris<sup>a</sup>, Andrew D.  
5 Bretherick<sup>b</sup>, Yanni Zeng<sup>b,3</sup>, Konrad Rawlik<sup>c</sup>, Carmen Amador<sup>b</sup>, Archie Campbell<sup>d</sup>, Chris S. Haley<sup>b</sup>,  
6 Caroline Hayward<sup>b</sup>, David J. Porteous<sup>a,d</sup>, Andrew M. McIntosh<sup>e</sup>, Riccardo E. Marioni<sup>a,4</sup>, Kathryn L.  
7 Evans<sup>a,4\*</sup>

8 <sup>1</sup>Present address: Centre for Clinical Brain Sciences, Chancellor's Building, 49 Little France Crescent,  
9 Edinburgh BioQuarter, Edinburgh, EH16 4SB

10 <sup>2</sup>Present address: MRC Centre for Reproductive Health, The Queen's Medical Research Institute,  
11 Edinburgh BioQuarter, 47 Little France Crescent, Edinburgh, EH16 4TJ

12 <sup>3</sup>Present address: Faculty of Forensic Medicine, Zhongshan School of Medicine, Sun Yat-Sen  
13 University, 74 Zhongshan 2nd Road, Guangzhou 510080, China.

14 <sup>4</sup>Joint last authors

15 \* Corresponding authors

16 **Affiliations**

17 <sup>a</sup>Centre for Genomic and Experimental Medicine, Institute of Genetics and Molecular Medicine,  
18 University of Edinburgh, Edinburgh, EH4 2XU, UK

19 <sup>b</sup>MRC Human Genetics Unit, Institute of Genetics and Molecular Medicine, University of Edinburgh,  
20 Edinburgh, EH4 2XU, UK

21 <sup>c</sup>Division of Genetics and Genomics, The Roslin Institute and Royal (Dick) School of Veterinary  
22 Studies, University of Edinburgh, Easter Bush, Roslin, UK

23 <sup>d</sup>Generation Scotland, Centre for Genomic and Experimental Medicine, Institute of Genetics and  
24 Molecular Medicine, University of Edinburgh, Edinburgh, EH4 2XU, UK

25 <sup>e</sup>Division of Psychiatry, University of Edinburgh, Royal Edinburgh Hospital, Edinburgh, EH10 5HF, UK

26 **Email addresses**

27 Rosie M. Walker: [rwalke13@staffmail.ed.ac.uk](mailto:rwalke13@staffmail.ed.ac.uk); Kadi Vaher: [kadi.vaher@ed.ac.uk](mailto:kadi.vaher@ed.ac.uk); Mairead L.  
28 Bermingham: [mairiad.bermingham@igmm.ed.ac.uk](mailto:mairiad.bermingham@igmm.ed.ac.uk), Stewart W. Morris:  
29 [Stewart.Morris@igmm.ed.ac.uk](mailto:Stewart.Morris@igmm.ed.ac.uk), Andrew Bretherick: [a.bretherick@ed.ac.uk](mailto:a.bretherick@ed.ac.uk), Yann Zeng:  
30 [zengyn5@mail.sysu.edu.cn](mailto:zengyn5@mail.sysu.edu.cn), Konrad Rawlik: [Konrad.Rawlik@roslin.ed.ac.uk](mailto:Konrad.Rawlik@roslin.ed.ac.uk), Carmen Amador:  
31 [carmen.amador@igmm.ed.ac.uk](mailto:carmen.amador@igmm.ed.ac.uk), Archie Campbell: [archie.campbell@ed.ac.uk](mailto:archie.campbell@ed.ac.uk), Chris S. Haley:  
32 [chris.haley@igmm.ed.ac.uk](mailto:chris.haley@igmm.ed.ac.uk), Caroline Hayward: [Caroline.Hayward@igmm.ed.ac.uk](mailto:Caroline.Hayward@igmm.ed.ac.uk), David J.  
33 Porteous: [david.porteous@igmm.ed.ac.uk](mailto:david.porteous@igmm.ed.ac.uk), Andrew M. McIntosh: [andrew.mcintosh@ed.ac.uk](mailto:andrew.mcintosh@ed.ac.uk),  
34 Riccardo E. Marioni: [Riccardo.Marioni@ed.ac.uk](mailto:Riccardo.Marioni@ed.ac.uk), Kathryn L. Evans: [Kathy.Evans@igmm.ed.ac.uk](mailto:Kathy.Evans@igmm.ed.ac.uk)

35 **Abstract**

36 BACKGROUND: The *Apolipoprotein E (APOE)*  $\epsilon 4$  allele is the strongest genetic risk factor for late  
37 onset Alzheimer's disease, while the  $\epsilon 2$  allele confers protection. Previous studies report differential  
38 DNA methylation of *APOE* between  $\epsilon 4$  and  $\epsilon 2$  carriers, but associations with epigenome-wide  
39 methylation have not previously been characterised.

40 METHODS: Using the EPIC array, we investigated epigenome-wide differences in whole blood DNA  
41 methylation patterns between Alzheimer's disease-free *APOE*  $\epsilon 4$  (n=2469) and  $\epsilon 2$  (n=1118) carriers  
42 from the two largest single-cohort DNA methylation samples profiled to date. Using a discovery,  
43 replication and meta-analysis study design, methylation differences were identified using  
44 epigenome-wide association analysis and differentially methylated region (DMR) approaches.  
45 Results were explored using pathway and methylation quantitative trait loci (meQTL) analyses.

46 RESULTS: We obtained replicated evidence for DNA methylation differences in a ~169kb region,  
47 which encompasses part of *APOE* and several upstream genes. Meta-analytic approaches identified  
48 DNA methylation differences outside of *APOE*: differentially methylated positions were identified in  
49 *DHCR24*, *LDLR* and *ABCG1* ( $2.59 \times 10^{-100} \leq P \leq 2.44 \times 10^{-8}$ ) and DMRs were identified in *SREBF2* and *LDLR*  
50 ( $1.63 \times 10^{-4} \leq P \leq 3.01 \times 10^{-2}$ ). Pathway and meQTL analyses implicated lipid-related processes and high  
51 density lipoprotein cholesterol was identified as a partial mediator of the methylation differences in  
52 *ABCG1* and *DHCR24*.

53 CONCLUSIONS: *APOE*  $\epsilon 4$  vs.  $\epsilon 2$  carrier status is associated with epigenome-wide methylation  
54 differences in the blood. The loci identified are located in *trans* as well as *cis* to *APOE* and implicate  
55 genes involved in lipid homeostasis.

56 KEYWORDS: Alzheimer's disease, APOE, Apolipoprotein E, DNA methylation, cholesterol, lipids

## 57 1. Background

58 The  $\epsilon 4$  allele of the *apolipoprotein E* gene (*APOE*) is the strongest genetic risk factor for late-onset  
59 (>65 years) Alzheimer's disease (AD) (1-3). Inheritance of one copy of this allele increases late-onset  
60 AD risk by two to four-fold, with two copies conferring an eight to twelve-fold increase in risk  
61 compared to the  $\epsilon 3/\epsilon 3$  genotype (4, 5). The  $\epsilon 4$  allele is also associated with a younger age-of-onset,  
62 with  $\epsilon 4$  homozygotes having an average age-of-onset of 68 years compared to 84 years for  $\epsilon 3$   
63 homozygotes (4). In contrast, the  $\epsilon 2$  allele has been associated with a ~50% reduction in AD risk  
64 compared to the  $\epsilon 3/\epsilon 3$  genotype (5).

65 The three *APOE* alleles ( $\epsilon 2/\epsilon 3/\epsilon 4$ ) are defined by two *APOE* exon 4 single nucleotide polymorphisms  
66 (SNPs) and encode functionally distinct ApoE isoforms. Isoform-dependent behaviours have been  
67 observed for many ApoE functions, including lipid metabolism, amyloid beta ( $A\beta$ ) metabolism, tau  
68 phosphorylation, inflammation, and synaptic plasticity, with ApoE4 and ApoE2 conferring effects  
69 consistent with increased and reduced AD risk, respectively (6, 7).

70 Despite the wealth of evidence linking ApoE to processes implicated in AD pathogenesis,  
71 understanding of the specific mechanism(s) by which genetic variation at this locus alters risk  
72 remains incomplete. *APOE* genotype acts in conjunction with other genetic and/or environmental  
73 factors to confer AD risk: the lifetime risk of dementia or mild cognitive impairment is 31%-40% for  
74  $\epsilon 4/\epsilon 4$  homozygotes (8) but the effects of *APOE*  $\epsilon 4$  have been shown to be modified by ethnic  
75 background and sex (5, 9). DNA methylation is associated with both genetic and environmental  
76 factors, and previous studies have identified associations with AD and neuropathological hallmarks  
77 of AD (10-12), AD risk factors (e.g. ageing (13), obesity (14) and lipid levels (15)), as well as modifiers  
78 of *APOE* genotype effects (e.g. sex (16) and ethnicity (17, 18)).

79 The two *APOE* haplotype-defining SNPs are located in a CpG island and have a direct effect on  
80 methylation by creating/destroying CpG sites (19). The *APOE*  $\epsilon 2/\epsilon 3/\epsilon 4$  haplotype is associated with

81 methylation at other CpG sites within *APOE* (20, 21) but, to date, associations with methylation  
82 across the epigenome have not been assessed. We hypothesised that characterising these  
83 associations would yield insights into the biological context in which *APOE* acts, thus facilitating the  
84 search for mechanisms conferring risk/resilience for AD. Importantly, by studying individuals who  
85 are free from AD, we have the potential to identify pathogenic processes that precede the onset of  
86 irreversible neurodegeneration.

## 87 **2. Methods**

### 88 **2.1. Participants**

89 The participants were selected from the Generation Scotland: Scottish Family Health Study  
90 (GS:SFHS) cohort (~24,000 participants aged ≥18 years at recruitment), which has been described  
91 previously (22, 23). The participants included in this study were of European (predominantly British)  
92 ancestry, following the exclusion of participants with likely recent Italian or African/Asian ancestry  
93 by principal components (PC) analysis (24). Participants attended a baseline clinical appointment at  
94 which they were phenotyped for social, demographic, health and lifestyle factors, completed  
95 cognitive assessments, and provided physical measurements and samples for DNA extraction.  
96 GS:SFHS obtained ethical approval from the NHS Tayside Committee on Medical Research Ethics, on  
97 behalf of the National Health Service (reference: 05/S1401/89) and has Research Tissue Bank Status  
98 (reference: 15/ES/0040).

### 99 **2.2. Blood sample collection and DNA extraction**

100 DNA was extracted from blood (9ml) collected in EDTA tubes using the Nucleon BACC3 Genomic  
101 DNA Extraction Kit (Fisher Scientific), following the manufacturer's instructions (25).

### 102 **2.3. Genotyping of *APOE***

103 The *APOE*  $\epsilon 2/\epsilon 3/\epsilon 4$  haplotypes are defined by two SNPs, rs429358 and rs7412, which were  
104 genotyped using TaqMan probes at the Clinical Research Facility, Edinburgh.

#### 105 **2.4. Measurement of cholesterol levels**

106 Total and high density lipoprotein (HDL) cholesterol were measured at the GS:SFHS baseline  
107 appointment and non-HDL cholesterol levels were calculated by subtracting HDL cholesterol from  
108 total cholesterol. The non-HDL cholesterol level reflects a combination of low density lipoprotein  
109 (LDL) cholesterol and very low-density lipoprotein.

#### 110 **2.5. Genome-wide DNA methylation profiling for EWAS analyses**

111 DNA methylation was profiled using the Infinium MethylationEPIC BeadChip (Illumina Inc.) in a  
112 discovery (n=5190) and replication (n=4583) sample, as described previously (26-28) (Supplementary  
113 Methods). The discovery and replication samples were normalised separately and converted to M-  
114 values. The discovery data was corrected for relatedness (Supplementary Methods). Participants in  
115 the replication sample were unrelated (SNP-based relatedness<0.05) to each other and/or discovery  
116 sample participants.

117 Poor performing probes, X/Y chromosome probes and participants with unreliable self-report data  
118 or potential XXY genotype were excluded (Supplementary Methods). The final discovery dataset  
119 comprised M-values at 760,943 loci for 5087 participants; the replication dataset comprised M-  
120 values at 758,332 loci for 4450 participants. All subsequent analyses of the DNA methylation data  
121 were carried out using R versions 3.6.0., 3.6.1., or 3.6.2. (29, 30).

#### 122 **2.6. Statistical analyses**

123 A flow chart indicating all analyses is presented in Figure 1.

#### 124 **2.7. Epigenome-wide association studies**

125 EWASs were implemented using limma (31). CpG M-values were the dependent variable and *APOE*  
126  $\epsilon 4$  vs.  $\epsilon 2$  carrier status (a binary variable indicating *APOE*  $\epsilon 4$  carriers with a “1” and *APOE*  $\epsilon 2$  with a  
127 “0”;  $\epsilon 4/\epsilon 2$  and  $\epsilon 3/\epsilon 3$  participants were excluded) was the predictor-of-interest. Participants self-  
128 reporting AD (n=five) were excluded. Additional covariates were included as below:

129 *Discovery sample*

130 CpG site (pre-corrected for relatedness, estimated cell counts and processing batch) ~ *APOE*  $\epsilon 4$  vs.  $\epsilon 2$   
131 + age + sex + smoking status + pack years + 20 methylation PCs

132 *Replication sample*

133 CpG site (M-values) ~ *APOE*  $\epsilon 4$  vs.  $\epsilon 2$  + age + sex + smoking status + pack years + estimated cell  
134 counts (granulocytes, natural killer cells, B-lymphocytes, CD4+T-lymphocytes and CD8+T-  
135 lymphocytes) + processing batch + 20 methylation PCs

136 The variables “smoking status”, “pack years” and the methylation PCs are explained in the  
137 Supplementary Methods.

138 An additional sensitivity analysis of the replication sample was performed in which the first 10  
139 genetic PCs, calculated using GCTA (32), were included. The decision to include 10 PCs was based on  
140 inspection of a scree plot (Supplementary Figure 1).

141 Limma was used to calculate empirical Bayes moderated t-statistics from which *P*-values were  
142 obtained. The significance threshold in the discovery sample was  $P \leq 3.6 \times 10^{-8}$  (33). Sites attaining  
143 significance in the discovery sample were assessed in the replication sample using a Bonferroni-  
144 corrected threshold of 0.05/no. sites assessed.

145 **2.8. EWAS meta-analysis**

146 Inverse variance-weighted fixed effects meta-analyses of 756,971 sites common to the discovery and  
147 replication EWAS results were performed using METAL (34). Sites attaining a meta-analysis  $P \leq 3.6 \times$   
148  $10^{-8}$  were considered significant.

## 149 **2.9. Comparison of DNA methylation levels between APOE haplotypes**

150 For the differentially methylated positions (DMPs) identified through the EWAS meta-analysis,  
151 pairwise differences in methylation levels between carriers of the APOE  $\epsilon 2/\epsilon 2$ ,  $\epsilon 2/\epsilon 3$ ,  $\epsilon 3/\epsilon 3$ ,  $\epsilon 3/\epsilon 4$ ,  
152 and  $\epsilon 4/\epsilon 4$  haplotypes in the discovery sample were investigated, using the R package lsmeans (35).  
153  $P$ -values were adjusted using a Bonferroni correction to account for the 10 within-CpG comparisons  
154 performed for each of the 20 CpGs assessed (i.e. an adjustment was performed for 200 tests).  
155 Corrected  $P \leq 0.05$  was considered statistically significant.

## 156 **2.10. Identification of differentially methylated regions**

157 DMRs associated with APOE  $\epsilon 4$  vs.  $\epsilon 2$  carrier status were identified using the dmrff.meta function  
158 from the dmrff R package (36). Putative DMRs were defined as regions containing two to thirty sites  
159 separated by  $\leq 500$  bp with EWAS meta-analysis  $P \leq 0.05$  and methylation changes in a consistent  
160 direction. Following dmrff's subregion selection step, DMRs with Bonferroni-adjusted  $P \leq 0.05$  were  
161 declared significant.

## 162 **2.11. Gene ontology/KEGG pathway analyses**

163 Gene ontology (GO) and KEGG pathway analyses were implemented using missMethyl's gometh  
164 function (37). The target list comprised probes that were suggestively associated with the  
165 phenotype-of-interest ( $P \leq 1 \times 10^{-5}$ ) in the meta-EWAS or that contributed to a significant DMR  
166 (adjusted  $P \leq 0.05$ ) and the gene universe included all analysed probes. Enrichment was assessed  
167 using a hypergeometric test, accounting for the bias arising from the variation in the number of



168 probes-per-gene. Bonferroni-corrected significance thresholds of  $P \leq 2.21 \times 10^{-6}$  and  $P \leq 1.48 \times 10^{-4}$   
169 were applied to account for the 22,578 GO terms and 337 KEGG pathways assessed.

## 170 **2.12. Bootstrap mediation analysis**

171 The roles of cholesterol levels (total cholesterol, HDL cholesterol and non-HDL cholesterol) in  
172 mediating any observed associations between *APOE*  $\epsilon 4$  vs.  $\epsilon 2$  carrier status and DNA methylation  
173 were assessed by bootstrap mediation analysis using the R package “mediation” (38). The analyses  
174 were performed using 10000 bootstrap samples in the discovery and replication samples separately  
175 and these results were then meta-analysed using inverse variance-weighted fixed effects meta-  
176 analyses to obtain meta-analyses *P*-values and effect estimates. Significant mediation was declared  
177 when the meta-analysis *P*-value met a Bonferroni-adjusted (to account for the assessment of 20  
178 DMPs) significance threshold of  $P \leq .05$ .

## 179 **2.13. Genotyping and imputation**

180 The genotyping and imputation of GS:SFHS to the Haplotype Reference Consortium reference panel  
181 release 1.1 (39) has been described previously (25, 40) (Supplementary Methods).

## 182 **2.14. Identification of methylation quantitative trait loci**

183 Methylation quantitative trait loci (meQTLs) were identified using the discovery sample. Following  
184 quality control, the data was normalised and corrected as described previously (41) (Supplementary  
185 Methods). Normalised and corrected data was available for 26 of the 31 CpGs-of-interest in this  
186 study. The resulting residuals were inverse rank normal transformed and entered as the dependent  
187 variable in simple linear model GWASs to identify meQTLs. GWASs were implemented using  
188 REGSCAN v0.5 (42). SNPs that were associated with a CpG with  $P \leq 1.92 \times 10^{-9}$  ( $5 \times 10^{-8}/26$ ) were  
189 declared to be meQTLs. SNPs located within one megabase up- or downstream of their associated  
190 CpG were defined as *cis* meQTLs; all other associated SNPs were defined as *trans* meQTLs. A look-up

191 analysis of the GWAS catalog (43) (GWAS catalog v1.0.2., downloaded 07/09/20) was performed in  
192 which SNPs identified as meQTLs for the CpGs of interest were queried for their significant ( $P \leq 5 \times 10^{-8}$ )  
193 disease or trait associations in the GWAS catalog.

## 194 **2.15. Association analyses of *APOE* $\epsilon 4$ vs. $\epsilon 2$ carrier status**

195 Association analyses were performed to assess whether meQTLs for the meta-analysis DMPs are  
196 associated with *APOE*  $\epsilon 4$  vs.  $\epsilon 2$  carrier status and, therefore, might contribute to the differences in  
197 methylation observed between *APOE*  $\epsilon 4$  and  $\epsilon 2$  carriers. Association tests used BOLT-LMM (44) to  
198 perform linear mixed models in participants with available *APOE* genotypes ( $\epsilon 2$   $n=2613$ ;  $\epsilon 4$   $n=5401$ ).  
199 BOLT-LMM adjusts for population structure and relatedness between individuals whilst assessing  
200 association. Sex was included as a covariate. Associations were considered significant when  $P \leq 5 \times 10^{-8}$ .  
201

## 202 **3. Results**

### 203 **3.1. Sample demographics**

204 The EWAS discovery sample comprised 1253 *APOE*  $\epsilon 4$  and 596 *APOE*  $\epsilon 2$  allele carriers and the  
205 replication sample comprised 1216 *APOE*  $\epsilon 4$  and 522 *APOE*  $\epsilon 2$  allele carriers. Twenty-seven  $\epsilon 2/\epsilon 2$ ,  
206 569  $\epsilon 2/\epsilon 3$ , 2926  $\epsilon 3/\epsilon 3$ , 1128  $\epsilon 3/\epsilon 4$  and 125  $\epsilon 4/\epsilon 4$  participants from the discovery sample were  
207 available for the pairwise analysis of genotypes. Key sample demographic information is presented  
208 in Supplementary Table 1.

### 209 **3.2. Identification of differentially methylated positions and regions in *APOE* $\epsilon 4$ vs. $\epsilon 2$ carriers**

210 An EWAS of *APOE*  $\epsilon 4$  vs.  $\epsilon 2$  carriers in the discovery sample identified eight significant DMPs, of  
211 which half were hypermethylated in *APOE*  $\epsilon 4$  carriers. These DMPs had a mean absolute effect size  
212 of 0.070 (range: 0.033 – 0.103) and  $P$ -values ranging from  $6.40 \times 10^{-56}$  to  $8.81 \times 10^{-9}$ . All eight sites  
213 were also significant ( $8.60 \times 10^{-49} \leq P \leq 7.25 \times 10^{-6}$ ) in the replication sample with a consistent direction

214 of effect (mean absolute effect size = 0.102; range: 0.049 – 0.170; Supplementary Table 2). The eight  
215 sites are located in a ~169kb region on chromosome 19 (chr. 19: 45,242,346-45,411,802;  
216 GRCh37/hg19), which spans a region of the genome upstream of and including part of the *APOE*  
217 gene (chr19: 45,409,039-45,412,650; GRCh37/hg19). A sensitivity analysis of the discovery sample in  
218 which a methylation-based smoking score (45) was included as a covariate instead of the smoking  
219 covariates included in the original analysis (“smoking status” and “pack years”) produced highly  
220 similar results across all measured CpGs (correlation between effect sizes = 0.99, 95% confidence  
221 interval (CI): 0.99-0.99;  $P < 2.2 \times 10^{-16}$ ; Supplementary Table 2). An additional sensitivity analysis in  
222 which the first 10 genetic PCs were included as additional covariates in the analysis of the replication  
223 sample also produced results that were highly correlated with those from the original replication  
224 sample analysis ( $r = 1.00$ , 95% CI: 1.00-1.00,  $P < 2.2 \times 10^{-16}$ ; Supplementary Table 2).

225 Inverse variance-weighted fixed effects meta-analysis of the discovery and replication samples  
226 identified 20 DMPs, with *APOE*  $\epsilon 4$  carrier status associated with hypomethylation at 13 (65%) of  
227 these sites. Across all 20 DMPs, the mean absolute effect size was 0.052 (range: 0.022 – 0.11) with *P*-  
228 values ranging from  $2.80 \times 10^{-100}$  to  $2.4 \times 10^{-8}$  (Table 1; Figure 2). Sixteen of these sites are located on  
229 chromosome 19q in a ~233kb region (chr19: 45,221,584 – 45,454,752; GRCh37/hg19) encompassing  
230 *APOE* and several surrounding genes (Supplementary Figure 2). Henceforth, the region containing  
231 *APOE* and neighbouring genes will be referred to as the “*APOE* locus”. The most significant DMP,  
232 cg13375295, is located ~4.5kb upstream of *Poliovirus Receptor-related 2 (PVRL2)*, a gene situated  
233 ~16.5kb upstream of *APOE*. Four other DMPs (cg10762466, cg10178308, cg11643040 and  
234 cg06198803) are located either upstream or in the gene body of *PVRL2*. Two DMPs (cg06750524 and  
235 cg16471933) are located in *APOE*: cg06750524, the DMP with the largest effect size, in the intron  
236 between exons 2 and 3; and cg16471933 in exon 4, 139bp 5’ of rs429358, one of the *APOE*  $\epsilon 4/\epsilon 2$ -  
237 defining SNPs. Although both the *APOE* DMPs are more highly methylated in *APOE*  $\epsilon 4$  carriers; the  
238 DMPs in the surrounding region do not show a consistent direction of effect.

239 Four DMPs are located outside of chromosome 19q: cg17901584, 785bp upstream of the 24-  
240 *dehydrocholesterol reductase (DHCR24)* gene on chromosome 1; cg19751789, 94bp upstream of the  
241 *low density lipoprotein receptor (LDLR)* gene on chromosome 19p; and two, cg16740586 and  
242 cg06500161, are located 668bp apart in the same intron of multiple *ATP Binding Cassette Subfamily*  
243 *G Member 1 (ABCG1)* isoforms.

244 To further investigate the pattern of methylation observed at these 20 DMPs, pairwise comparisons  
245 were performed between carriers of the following *APOE* haplotypes:  $\epsilon 2/\epsilon 2$ ,  $\epsilon 2/\epsilon 3$ ,  $\epsilon 3/\epsilon 3$ ,  $\epsilon 3/\epsilon 4$ , and  
246  $\epsilon 4/\epsilon 4$ . These analyses revealed a range of allele-associated methylation patterns, which are depicted  
247 in Supplementary Figure 3 and described in Supplementary Table 3. Carriers of the *APOE*  $\epsilon 2$  allele  
248 ( $\epsilon 2/\epsilon 2$  or  $\epsilon 2/\epsilon 3$ ) differed from  $\epsilon 3/\epsilon 3$  homozygotes at 14 of the DMPs, whilst carriers of the *APOE*  $\epsilon 4$   
249 allele ( $\epsilon 4/\epsilon 4$  or  $\epsilon 3/\epsilon 4$ ) differed from  $\epsilon 3/\epsilon 3$  homozygotes at four DMPs. Dosage effects were  
250 observed at two DMPs for  $\epsilon 2$  carriers (Supplementary Figure 3 A and S) and one DMP for  $\epsilon 4$  carriers  
251 (Supplementary Figure 3B), although the small numbers of participants who are homozygous for  
252 *APOE*  $\epsilon 2$  ( $n = 27$ ) and  $\epsilon 4$  ( $n = 128$ ) likely rendered our study underpowered to detect all dosage  
253 effects. For the two DMPs located within the *APOE* gene (cg06750524 and cg16471933), an increase  
254 in mean methylation levels was observed from  $\epsilon 2/\epsilon 2$  homozygotes to  $\epsilon 3/\epsilon 3$  homozygotes, with a  
255 further increase to the  $\epsilon 4/\epsilon 4$  group (Supplementary Figure 3B and E). At the four DMPs outside of  
256 the *APOE* locus, the methylation differences appear to be predominantly driven by the  $\epsilon 2$  allele  
257 (Supplementary Figure 3K, M, O and S).

258 Differentially methylated regions (DMRs) were identified using a meta-analysis approach, which  
259 identified six significant regions (Supplementary Figure 4). Across all the DMRs, the mean absolute  
260 effect size was 0.182 (range: 0.135 – 0.231) and Bonferroni-adjusted *P*-values ranged from  $1.63 \times 10^{-4}$   
261 to  $3.01 \times 10^{-2}$  (Table 2). Three of the DMRs are located at the *APOE* locus, two are in the first intron  
262 of *Sterol Regulatory Element Binding Transcription Factor 2 (SREBF2)* on chromosome 22, and the  
263 other is in the putative promoter of *LDLR* on chromosome 19p. All but one of the DMRs, which is

264 located 190 bp upstream of the *apolipoprotein C1 pseudogene 1 (APOC1P1)* at the *APOE* locus, are  
265 hypomethylated in *APOE*  $\epsilon 4$  carriers. Only one of the DMRs, located in an exon of a read-through  
266 transcript involving *apolipoprotein C2 (APOC2)* and *apolipoprotein C4 (APOC4)*, contains CpGs that  
267 were identified as DMPs (cg13119609 and cg09555818).

268 GO analysis was carried out using the 19 Entrez IDs mapping to the 46 CpG sites with a meta-EWAS  
269  $P \leq 1 \times 10^{-5}$  or that contributed to a significant DMR. This identified 78 significant GO terms (Table 3;  
270 Supplementary Table 4), the most significant of which was “cholesterol metabolic process” ( $P = 2.00 \times$   
271  $10^{-11}$ ). Significant enrichment for the KEGG pathways “cholesterol metabolism” ( $P = 5.93 \times 10^{-10}$ ) and  
272 “steroid biosynthesis” ( $P = 1.22 \times 10^{-4}$ ) was also observed.

### 273 **3.3. Assessment of the role of cholesterol in mediating methylation differences between *APOE*** 274 **$\epsilon 4$ and $\epsilon 2$ carriers**

275 Given the well-established role of ApoE in cholesterol metabolism (6), bootstrap mediation analyses  
276 were performed to assess the role of cholesterol levels (total, HDL or non-HDL cholesterol) in  
277 mediating the association between *APOE*  $\epsilon 4$  vs.  $\epsilon 2$  carrier status and methylation at the 20 meta-  
278 analysis DMPs. Inverse variance-weighted fixed effects meta-analysis of the bootstrap mediation  
279 analyses in the discovery and replication samples identified HDL cholesterol as a significant mediator  
280 of the associations with the two *ABCG1* DMPs cg06500161 (effect size = 0.006; effect size standard  
281 error = 0.001;  $P = 1.18 \times 10^{-6}$ ) and cg16740586 (effect size = 0.004; effect size standard error = 0.001;  
282  $P = 4.93 \times 10^{-5}$ ), and the *DHCR24* promoter DMP, cg17901584 (effect size = -0.007; effect size standard  
283 error = 0.001;  $P = 6.04 \times 10^{-6}$ ), for which it mediated 25.2%, 11.5%, and 18.2% of the relationship,  
284 respectively (Supplementary Table 5). For some sites, inspection of the *P*-values indicated total and  
285 non-HDL cholesterol to be significant mediators but the proportion of the relationship between  
286 *APOE*  $\epsilon 4$  vs.  $\epsilon 2$  carrier status and methylation attributable to the mediator was negative  
287 (Supplementary Table 5). This indicates that, at these sites, the direction of the association between

288 the cholesterol phenotypes and methylation is the opposite to the direction of the association  
289 between *APOE*  $\epsilon 4$  vs.  $\epsilon 2$  carrier status and methylation.

290 **3.4. Assessment of meQTLs associated with loci that are differentially methylated between**  
291 ***APOE*  $\epsilon 4$  and  $\epsilon 2$  carriers**

292 To explore the DMP and DMR CpGs further, meQTL analyses were performed. Whilst it was  
293 expected that meQTLs for the DMP and DMR CpGs would be identified at the *APOE* locus, the  
294 identification of meQTLs outside of this locus would be of particular interest. Should meQTLs outside  
295 of the *APOE* locus be found to show non-random segregation with *APOE*  $\epsilon 4$  vs.  $\epsilon 2$  carrier status,  
296 these meQTL SNPs might contribute to the methylation differences observed in this study and *APOE*  
297 genotype effects more generally.

298 It was possible to assess meQTLs for 26 of the 31 CpGs of interest (from the DMP and DMR  
299 analyses); amongst these CpGs, 23 were associated with a meQTL. In total, 3727 significant CpG-SNP  
300 associations were identified for the 23 CpGs, involving 1654 unique SNPs (Figure 3; Supplementary  
301 Table 6). Unsurprisingly, more than half of the meQTLs ( $n=947$ ) were located in a  $\sim 719$ kb region  
302 (chr19: 45,004,645– 45,723,446; GRCh37/hg19) spanning *APOE*. The *APOE* region meQTLs are  
303 associated with 16 CpGs, of which 14 are located at the *APOE* locus. None of these meQTLs is  
304 associated with all 16 CpGs: two are each associated with nine CpGs: rs7412, one of the *APOE*  
305  $\epsilon 2/\epsilon 3/\epsilon 4$ -defining SNPs; and rs41290120, an intronic *PVRL2* SNP that is in high linkage disequilibrium  
306 with rs7412 with  $D' = 0.85$  in the British population (46). The two CpGs associated in *trans* with SNPs  
307 in the *APOE* region are cg16000331 in *SREBF2* and cg19751789 in *LDLR*.

308 Outside of the *APOE* locus, the remaining 707 meQTLs, which are associated with 10 CpGs, are  
309 located in 11 genomic regions (Figure 3; Supplementary Table 7), with each region containing  
310 meQTLs associated with between one and eight CpGs-of-interest. To assess whether these meQTLs  
311 might contribute to *APOE*  $\epsilon 4$  vs.  $\epsilon 2$ -associated methylation differences, their association with *APOE*

312  $\epsilon 4$  vs.  $\epsilon 2$  carrier status was assessed. No significant associations were observed, suggesting that the  
313 *APOE*  $\epsilon 4$  vs.  $\epsilon 2$ -associated methylation differences are predominantly driven by genotype at the  
314 *APOE* locus.

315 To investigate potential trait/disease associations with variation in methylation levels at the CpGs-of-  
316 interest, the GWAS catalog was queried(43). This identified 234/1654 meQTLs as having genome-  
317 wide significant associations with 316 traits (Supplementary Table 8). More than one third of the  
318 associations are with a lipid-related traits, including LDL, HDL and total cholesterol levels. As  
319 expected, many of the meQTL SNPs within the *APOE* locus have previously been associated with AD  
320 and related traits, such as “Cerebrospinal fluid p-tau levels”, “Cerebral amyloid deposition (PET  
321 imaging)” and “Cognitive decline”. Interestingly, five SNPs located outside of the *APOE* locus have  
322 also been associated with traits related cognitive ability (“Cognitive ability, years of educational  
323 attainment or schizophrenia (pleiotropy) “, “General cognitive ability”, “Intelligence” and “Self-  
324 reported math ability”). Four of these SNPs encompass the 3’ end of *CCDC134* and most of the  
325 neighbouring *SREBF2*. Between them, these four SNPs are associated in *cis* with methylation at the  
326 four CpGs forming the two *SREBF2* DMRs. The fifth SNP, which is located on chromosome 6 in the  
327 pseudogene *CCDC162P*, is associated with methylation at CpGs in *SREBF2* and *LDLR*. Three meQTL  
328 SNPs have been associated with several age-related disorders (e.g. heart failure, stroke, and cancer)  
329 and endophenotypes of these disorders (including cholesterol levels, blood pressure and blood  
330 glucose) in a pleiotropic GWAS meta-analysis (47).

#### 331 4. Discussion

332 We performed the first epigenome-wide comparison of DNA methylation between carriers of the  
333 *APOE*  $\epsilon 4$  and  $\epsilon 2$  haplotypes, which confer risk for and protection from AD, respectively. In large  
334 discovery and replication samples, we confirm the presence of *APOE* haplotype-associated  
335 methylation differences in *APOE*, demonstrate that differences in methylation at the *APOE* locus

336 span a broad genomic locus encompassing several genes, and find evidence for altered methylation  
337 at sites unlinked to the *APOE* locus. The observed methylation differences are located in a network  
338 of genes involved in lipid metabolism and homeostasis.

339 Methylation differences were identified using discovery, replication and meta-analysis EWASs and  
340 DMR analysis. Eight DMPs located on chromosome 19 in a ~169kb region spanning from upstream of  
341 *BCL3* to the *APOE*'s fourth exon showed replicated association. An additional twelve DMPs, eight of  
342 which are located in a ~233kb region at the *APOE* locus, were identified by meta-analysing the  
343 discovery and replication samples. DMR analysis identified six regions of differential methylation,  
344 both within and outside of the *APOE* locus.

345 Within the *APOE* gene, two DMPs, cg06750524, in the second intron, and cg16471933, in the fourth  
346 exon, were identified. *APOE*  $\epsilon 4$  carriers showed higher methylation levels at both. This observation  
347 directly replicates a previous study (21) and is in line with Foraker et al.'s observation of increased  
348 methylation of the *APOE* exon 4 CpG island in  $\epsilon 4$  carriers (20). Moreover, we have previously  
349 demonstrated (48) that the pattern of methylation in *APOE* in our sample is consistent with that  
350 described by Ma et al. (2015) (21). Pairwise comparisons revealed differences in *APOE* methylation  
351 to be driven both by differences between  $\epsilon 2$  carriers and  $\epsilon 3/\epsilon 3$  homozygotes and  $\epsilon 4$  carriers and  
352  $\epsilon 3/\epsilon 3$  homozygotes. One interpretation of this observation is that the spectrum of methylation at  
353 the *APOE* DMPs reflects the spectrum of AD risk conferred by different AD genotypes. It is clear,  
354 however, that additional, likely experimental, studies are required to assess the implications of the  
355 observed methylation pattern.

356 The differentially methylated CpGs at the *APOE* locus span a broad region that encompasses several  
357 genes containing AD-associated variants (49). Long-ranging linkage disequilibrium in the region  
358 complicates the interpretation of association signals; however, conditional analysis and fine-  
359 mapping studies suggest the presence of multiple independent AD risk loci across the region (3, 49).



360 As such, the methylation differences observed in this study may be associated with variants that,  
361 whilst being in LD with the *APOE*  $\epsilon 2/\epsilon 4$ -defining SNPs, confer risk via different pathways to these  
362 SNPs. This notion is supported by the observation that SNPs that define an *APOE*  $\epsilon 4$ -independent  
363 AD-risk haplotype in *PVRL2* (49) are highly significant meQTLs for the most significant DMP identified  
364 in this study.

365 Beyond the *APOE* locus, DMPs were identified in an *ABCG1* intron, and upstream of *DHCR24* and  
366 *LDLR*. Comparisons with  $\epsilon 3/\epsilon 3$  homozygotes suggested the  $\epsilon 2$  allele to be the primary driver of these  
367 differences, suggesting the possibility that altered methylation of genes involved in lipid metabolism  
368 might contribute to this allele's protective effects. DMRs were identified in the gene body of *SREBF2*  
369 and in the putative promoter region of *LDLR*. The CpGs involved in the DMPs and DMRs located  
370 outside of the *APOE* locus are associated with several meQTLs, with all of the CpGs except those  
371 involved in the *LDLR* DMR being associated with meQTLs in *cis* as well as in *trans*. Our findings did  
372 not, however, support a role for *cis* meQTLs for these CpGs driving associations with *APOE*  $\epsilon 4$  vs.  $\epsilon 2$   
373 carrier status.

374 The genes outside of the *APOE* locus that harbour differentially methylated CpGs are implicated in  
375 lipid metabolism or homeostasis. *ABCG1*, which is highly expressed in the brain, encodes a  
376 cholesterol and phospholipid transporter and is involved in regulating the sterol biosynthetic  
377 pathway (50). *DHCR24*, which encodes the cholesterol biosynthesis enzyme  $3\beta$ -hydroxysterol- $\Delta 24$   
378 reductase, also known as seladin-1, plays a neuroprotective role in AD-related stress conditions,  
379 including  $A\beta$  toxicity, oxidative stress and inflammation (51, 52). The alteration of seladin-1  
380 expression in mouse brain and human neuroblastoma cell cultures has been shown to affect  $\beta$ -  
381 secretase processing of amyloid precursor protein, with reduced seladin-1 being associated with an  
382 increased rate of  $A\beta$  production (53). Future studies should assess whether methylation-associated  
383 differences in the brain expression of seladin-1 (6) might mediate the established associations  
384 between *APOE*  $\epsilon 4$  vs.  $\epsilon 2$  haplotype and  $A\beta$  production. The *LDLR* gene encodes the LDL receptor, one

385 of the neuronal receptors capable of mediating the endocytosis of ApoE, thus, maintaining brain  
386 cholesterol homeostasis. *LDLR* expression is regulated, in part, by *SREBF2*, a transcriptional regulator  
387 of sterol-regulated genes, which contains a SNP that is associated both with *SREBF2* expression and  
388 CSF levels of the AD biomarkers A $\beta$  and tau (54).

389 The link between *APOE*  $\epsilon 4$  vs.  $\epsilon 2$ -associated methylation differences and lipid-related processes and  
390 pathways was further supported by GO and KEGG analyses, the identification of meQTLs for the  
391 differentially methylated CpGs, which were clustered in genomic regions that contain several lipid-  
392 related genes, and their GWAS-associated phenotypes. It would be of interest to investigate the  
393 mechanisms underlying the clustering of meQTLs in these genomic regions. Future studies might  
394 assess, for example, the extent to which meQTLs associated with the differentially methylated CpGs  
395 are enriched in these regions and whether they disproportionately affect certain sequence motifs.  
396 Previous EWASs have also identified associations between some of the *APOE*  $\epsilon 4$  vs.  $\epsilon 2$ -associated  
397 CpGs and cholesterol levels: the *DHCR24* (cg17901584), *ABCG1* (cg06500161) and *SREBF2*  
398 (cg16000331) DMPs have been associated with HDL cholesterol, total cholesterol and triglyceride  
399 levels (15, 55-57). Comparisons with previous EWASs are, however, limited by the fact that the  
400 majority of previous EWASs used the 450K array, which, does not contain 10 of the *APOE*  $\epsilon 4$  vs.  $\epsilon 2$ -  
401 associated CpGs.

402 As differences in lipid metabolism between carriers of the *APOE*  $\epsilon 4$  and  $\epsilon 2$  haplotypes are well-  
403 documented (6), we assessed whether variation in blood cholesterol levels might mediate the  
404 observed *APOE*  $\epsilon 4$  vs.  $\epsilon 2$ -associated methylation differences. HDL cholesterol was found to be a  
405 partial mediator of the relationship between *APOE*  $\epsilon 4$  vs.  $\epsilon 2$  carrier status and methylation at three  
406 loci located outside of the *APOE* locus (two within *ABCG1* and one in the promoter of *DHCR24*), thus  
407 suggesting one mechanism that might underlie these *trans* effects. Consistent with our observation  
408 that methylation differences at these loci appear to be predominantly driven by *APOE*  $\epsilon 2$  carriers  
409 (when compared to *APOE*  $\epsilon 3/\epsilon 3$  homozygotes), higher HDL cholesterol levels have been reported in

410 carriers of *APOE*  $\epsilon$ 2 (58). The effect of HDL cholesterol on methylation varied between the three loci,  
411 with *APOE*  $\epsilon$ 2 carriers showing increased methylation at the site located in the *DHCR24* promoter  
412 and decreased methylation at the two *ABCG1* sites. This suggests that increased HDL cholesterol  
413 levels do not exert a general effect on methylation but rather that methylation varies in a locus-  
414 specific manner in response to variation in HDL levels. It should be noted that an assumption of this  
415 analysis is that reverse causation does not exist between the outcome, methylation, and the  
416 mediator, cholesterol. Previous Mendelian Randomisation studies have predominantly supported  
417 this premise (59, 60); however, the ability to identify robust genetic instruments has limited both the  
418 number of methylation sites assessed and the ability to assess reverse causation. Limitations to the  
419 GS:SFHS cholesterol data should also be noted when interpreting these findings: triglyceride levels  
420 were not measured, preventing LDL cholesterol assessment; and blood samples were not taken at a  
421 consistent time of day or after fasting.

422 The cross-sectional nature of this study precludes the observed methylation differences being  
423 interpreted as conferring risk, protection or compensation. Comparison of methylation at these loci  
424 in *APOE*  $\epsilon$ 4 and  $\epsilon$ 2 carriers with AD would be useful in addressing this question; however, the  
425 optimum study design would involve the longitudinal assessment of the trajectory of  $\epsilon$ 4 vs.  $\epsilon$ 2-  
426 associated methylation differences in AD-free individuals in midlife who either do or do not later  
427 develop AD. These analyses are currently not feasible due to the small sizes of existing AD patient  
428 blood-based DNA methylation samples and insufficient follow-up time of large population-based  
429 samples.

430 Studies assessing the association of neuropathological hallmarks (neuritic plaque burden and/or  
431 neurofibrillary tangles) of AD with DNA methylation in the brain have not identified the loci  
432 identified in the present study (10, 12, 61). Although the phenotypes assessed differ, the existence  
433 of *APOE* haplotype-associated differences in  $A\beta$  metabolism and tau phosphorylation (6) suggest  
434 that some degree of overlap might be expected. The neuropathological hallmarks of AD are,

435 however, complex phenotypes and *APOE* haplotype will be one of many contributing factors (De  
436 Jager et al. (10) reported that *APOE*  $\epsilon 4$  could account for 13.9% of the variance in NP burden  
437 observed in their participants). In addition, the smaller samples assessed by De Jager et al. (10),  
438 Lunnon et al. (12) and Smith et al. (61) may have been inadequately powered to detect any  
439 methylation differences driven by *APOE* haplotype. Differences in age and methylation profiling  
440 platform are also likely to limit comparability: the participants assessed in these studies were much  
441 older (mean age >75 years) than those assessed in our study (mean age  $\sim$  50 years) and array  
442 differences mean that only two thirds of our DMP/DMR probes were assessed. Two important  
443 corollaries of the age difference are that brain-based studies are more likely to (i) suffer from  
444 survivor bias and (ii) be better suited to investigating end-of-disease processes. It is also important  
445 to note that *APOE* is involved in multiple processes, with *APOE*  $\epsilon 4$  conferring risk for AD, at least in  
446 part, via mechanisms that are not related to A $\beta$  or tau pathology. A recent study has indicated that  
447 *APOE*  $\epsilon 4$ -associated breakdown of the blood-brain barrier in the hippocampus and medial temporal  
448 lobe contributes to *APOE*  $\epsilon 4$ -associated cognitive decline independently of A $\beta$  or tau (62).

449 The blood provides an easily accessible tissue that can be repeatedly sampled to characterise pre-  
450 morbid markers of risk. The extent to which it can provide mechanistic insights into diseases that are  
451 considered predominantly brain-based, however, is a perennial subject of debate. *Cis* meQTL effects  
452 tend to be highly correlated ( $r = 0.78$ ) between the blood and the brain (63), supporting the use of  
453 the blood to study the effects of genetic risk factors for brain-based diseases. It is also important to  
454 note the increasing recognition of the role of peripheral processes in conferring risk for AD (64). As  
455 the blood provides a conduit by which many circulating factors (e.g. plasma proteins and microbial  
456 metabolites) reach the brain and affect brain ageing (65), assessing DNA methylation in the blood is  
457 likely to be informative regarding systemic factors contributing to AD pathogenesis. Although *APOE*  
458 is synthesised separately in the blood and the brain and neither *APOE* nor cholesterol can cross the  
459 blood-brain barrier (66, 67), there is cross-talk between brain and blood cholesterol via oxysterols

460 (67), levels of which vary by *APOE*  $\epsilon 2/\epsilon 3/\epsilon 4$  haplotype (68). Peripheral hypercholesterolemia has  
461 been associated with increased oxysterol levels in the brain, which have been implicated in with  
462 production and accumulation of  $A\beta$ , increased neuroinflammation and neuronal death (67).

463 The association between *APOE* genotype and AD varies between populations (5), with studies in  
464 populations of Hispanic and African ancestry often reporting attenuated effect sizes for the  $\epsilon 4$  allele  
465 compared to studies involving European and Asian participants (69, 70). Moreover, Rajabli et al. (70)  
466 have shown that genetic variation local to *APOE* is likely to confer protection from the effects of the  
467  $\epsilon 4$  allele in individuals of African ancestry. As the participants in the present study were of European  
468 ancestry, it should be noted that these findings are likely to be European-specific and future studies  
469 should assess their generalisability and relevance to AD pathogenesis in other populations.

## 470 **5. Conclusions**

471 This is the first study to characterise epigenome-wide DNA methylation differences between carriers  
472 of *APOE*  $\epsilon 4$  and  $\epsilon 2$ . In AD-free individuals, we identified several methylation differences both at the  
473 *APOE* locus and in the rest of the genome, which converge on lipid-related pathways. Strengths of  
474 the study include the large samples available for EWAS analysis, the epigenome-wide approach, the  
475 use of a well-phenotyped cohort with genotype data, and the avoidance of reverse causation by  
476 studying AD-free participants. Future studies should investigate the causal relationship between  
477 *APOE* genotype, DNA methylation and lipid-related processes and their role in AD pathogenesis.

## 478 **Abbreviations**

479  $A\beta$ : amyloid beta; AD: Alzheimer's disease; CI: confidence interval; DMP: differentially methylated  
480 position; DMR: differentially methylated region; EWAS: epigenome-wide association study; GS:SFHS:  
481 Generation Scotland: Scottish Family Health Study; HDL: high density lipoprotein; LDL: low density  
482 lipoprotein; PC: principal component; SNP: single nucleotide polymorphism

483 **Declarations**

484 *Ethics approval and consent to participate*

485 GS:SFHS obtained ethical approval from the NHS Tayside Committee on Medical Research Ethics, on  
486 behalf of the National Health Service (reference: 05/S1401/89) and has Research Tissue Bank Status  
487 (reference: 15/ES/0040), providing generic ethical approval for a wide range of uses within medical  
488 research. All experimental methods were in accordance with the Helsinki declaration.

489 *Consent for publication*

490 Not applicable

491 *Availability of data and materials*

492 According to the terms of consent for GS:SFHS, access to data must be reviewed by the GS Access  
493 Committee ([access@generationscotland.org](mailto:access@generationscotland.org)).

494 *Competing interests*

495 AMM has received grant support from Pfizer, Eli Lilly, Janssen and The Sackler Trust. These sources  
496 are not connected to the current investigation. AMM has also received speaker fees from Janssen  
497 and Illumina. The remaining authors report no conflicts of interest.

498 *Funding*

499 This work was supported by a Wellcome Trust Strategic Award “Stratifying Resilience and  
500 Depression Longitudinally” (STRADL) [104036/Z/14/Z] to AMM, KLE, CSH, DJP and others, and an  
501 MRC Mental Health Data Pathfinder Grant [MC\_PC\_17209] to AMM and DJP. REM is supported by  
502 an Alzheimer’s Research UK major project grant [ARUK-PG2017B-10]. KV is funded by the Wellcome  
503 Trust Translational Neuroscience PhD Programme at the University of Edinburgh [108890/Z/15/Z].

504 ADB would like to acknowledge funding from the Wellcome PhD training fellowship for clinicians  
505 [204979/Z/16/Z], the Edinburgh Clinical Academic Track (ECAT) programme. Generation Scotland  
506 received core support from the Chief Scientist Office of the Scottish Government Health Directorates  
507 [CZD/16/6] and the Scottish Funding Council [HR03006]. Genotyping of the GS:SFHS samples was  
508 carried out by the Genetics Core Laboratory at the Clinical Research Facility, Edinburgh, Scotland and  
509 was funded by the UK's Medical Research Council and the Wellcome Trust [104036/Z/14/Z]. DNA  
510 methylation profiling of the GS:SFHS samples was funded by the Wellcome Trust Strategic Award  
511 [10436/Z/14/Z] with additional funding from a 2018 NARSAD Young Investigator Grant from the  
512 Brain & Behavior Research Foundation [27404].

513 The funding bodies did not play any role in the design of the study, the collection, analysis, or  
514 interpretation of the data, or in the writing of the manuscript.

#### 515 *Authors' contributions*

516 Conception and design: RMW, KLE, REM; data analysis: RMW, KV, MLB, ADB, CH. Drafting the article:  
517 RMW and KLE; data preparation: RMW, MLB, SWM, KR, AC, ADB, YZ, CA; data collection: AMM, KLE,  
518 CSH, DJP. Revision of the article: RMW, KV, MLB, ADB, YZ, CA, AC, CSH, DJP, REM, KLE; all authors  
519 read and approved the final manuscript.

#### 520 *Acknowledgements*

521 We are grateful to all the families who took part, the general practitioners and the Scottish School of  
522 Primary Care for their help in recruiting them, and the whole Generation Scotland team, which  
523 includes interviewers, computer and laboratory technicians, clerical workers, research scientists,  
524 volunteers, managers, receptionists, healthcare assistants and nurses.

## 525 References

- 526 1. Lambert JC, Ibrahim-Verbaas CA, Harold D, Naj AC, Sims R, Bellenguez C, et al. Meta-analysis  
527 of 74,046 individuals identifies 11 new susceptibility loci for Alzheimer's disease. *Nat Genet.*  
528 2013;45(12):1452-8.
- 529 2. Kunkle BW, Grenier-Boley B, Sims R, Bis JC, Damotte V, Naj AC, et al. Genetic meta-analysis  
530 of diagnosed Alzheimer's disease identifies new risk loci and implicates Abeta, tau, immunity and  
531 lipid processing. *Nat Genet.* 2019;51(3):414-30.
- 532 3. Jansen IE, Savage JE, Watanabe K, Bryois J, Williams DM, Steinberg S, et al. Genome-wide  
533 meta-analysis identifies new loci and functional pathways influencing Alzheimer's disease risk. *Nat*  
534 *Genet.* 2019;51(3):404-13.
- 535 4. Corder EH, Saunders AM, Strittmatter WJ, Schmechel DE, Gaskell PC, Small GW, et al. Gene  
536 dose of apolipoprotein E type 4 allele and the risk of Alzheimer's disease in late onset families.  
537 *Science.* 1993;261(5123):921-3.
- 538 5. Farrer LA, Cupples LA, Haines JL, Hyman B, Kukull WA, Mayeux R, et al. Effects of age, sex,  
539 and ethnicity on the association between apolipoprotein E genotype and Alzheimer disease. A meta-  
540 analysis. APOE and Alzheimer Disease Meta Analysis Consortium. *JAMA.* 1997;278(16):1349-56.
- 541 6. Safieh M, Korczyn AD, Michaelson DM. ApoE4: an emerging therapeutic target for  
542 Alzheimer's disease. *BMC Med.* 2019;17(1):64.
- 543 7. Tzioras M, Davies C, Newman A, Jackson R, Spires-Jones T. Invited Review: APOE at the  
544 interface of inflammation, neurodegeneration and pathological protein spread in Alzheimer's  
545 disease. *Neuropathol Appl Neurobiol.* 2019;45(4):327-46.
- 546 8. Qian J, Wolters FJ, Beiser A, Haan M, Ikram MA, Karlawish J, et al. APOE-related risk of mild  
547 cognitive impairment and dementia for prevention trials: An analysis of four cohorts. *PLoS Med.*  
548 2017;14(3):e1002254.
- 549 9. Babenko VN, Afonnikov DA, Ignatieva EV, Klimov AV, Gusev FE, Rogaev EI. Haplotype analysis  
550 of APOE intragenic SNPs. *BMC Neurosci.* 2018;19(Suppl 1):16.
- 551 10. De Jager PL, Srivastava G, Lunnon K, Burgess J, Schalkwyk LC, Yu L, et al. Alzheimer's disease:  
552 early alterations in brain DNA methylation at ANK1, BIN1, RHBF2 and other loci. *Nat Neurosci.*  
553 2014;17(9):1156-63.
- 554 11. Gasparoni G, Bultmann S, Lutsik P, Kraus TFJ, Sordon S, Vlcek J, et al. DNA methylation  
555 analysis on purified neurons and glia dissects age and Alzheimer's disease-specific changes in the  
556 human cortex. *Epigenetics Chromatin.* 2018;11(1):41.
- 557 12. Lunnon K, Smith R, Hannon E, De Jager PL, Srivastava G, Volta M, et al. Methylomic profiling  
558 implicates cortical deregulation of ANK1 in Alzheimer's disease. *Nat Neurosci.* 2014;17(9):1164-70.
- 559 13. Sliker RC, Relton CL, Gaunt TR, Slagboom PE, Heijmans BT. Age-related DNA methylation  
560 changes are tissue-specific with ELOVL2 promoter methylation as exception. *Epigenetics Chromatin.*  
561 2018;11(1):25.
- 562 14. Wahl S, Drong A, Lehne B, Loh M, Scott WR, Kunze S, et al. Epigenome-wide association  
563 study of body mass index, and the adverse outcomes of adiposity. *Nature.* 2017;541(7635):81-6.



- 564 15. Hedman AK, Mendelson MM, Marioni RE, Gustafsson S, Joehanes R, Irvin MR, et al.  
565 Epigenetic Patterns in Blood Associated With Lipid Traits Predict Incident Coronary Heart Disease  
566 Events and Are Enriched for Results From Genome-Wide Association Studies. *Circ Cardiovasc Genet*.  
567 2017;10(1).
- 568 16. Singmann P, Shem-Tov D, Wahl S, Grallert H, Fiorito G, Shin SY, et al. Characterization of  
569 whole-genome autosomal differences of DNA methylation between men and women. *Epigenetics*  
570 *Chromatin*. 2015;8:43.
- 571 17. Galanter JM, Gignoux CR, Oh SS, Torgerson D, Pino-Yanes M, Thakur N, et al. Differential  
572 methylation between ethnic sub-groups reflects the effect of genetic ancestry and environmental  
573 exposures. *Elife*. 2017;6.
- 574 18. Yuan V, Price EM, Del Gobbo G, Mostafavi S, Cox B, Binder AM, et al. Accurate ethnicity  
575 prediction from placental DNA methylation data. *Epigenetics Chromatin*. 2019;12(1):51.
- 576 19. Yu CE, Cudaback E, Foraker J, Thomson Z, Leong L, Lutz F, et al. Epigenetic signature and  
577 enhancer activity of the human APOE gene. *Hum Mol Genet*. 2013;22(24):5036-47.
- 578 20. Foraker J, Millard SP, Leong L, Thomson Z, Chen S, Keene CD, et al. The APOE Gene is  
579 Differentially Methylated in Alzheimer's Disease. *J Alzheimers Dis*. 2015;48(3):745-55.
- 580 21. Ma Y, Smith CE, Lai CQ, Irvin MR, Parnell LD, Lee YC, et al. Genetic variants modify the effect  
581 of age on APOE methylation in the Genetics of Lipid Lowering Drugs and Diet Network study. *Aging*  
582 *Cell*. 2015;14(1):49-59.
- 583 22. Smith BH, Campbell A, Linksted P, Fitzpatrick B, Jackson C, Kerr SM, et al. Cohort Profile:  
584 Generation Scotland: Scottish Family Health Study (GS:SFHS). The study, its participants and their  
585 potential for genetic research on health and illness. *Int J Epidemiol*. 2013;42(3):689-700.
- 586 23. Smith BH, Campbell H, Blackwood D, Connell J, Connor M, Deary IJ, et al. Generation  
587 Scotland: the Scottish Family Health Study; a new resource for researching genes and heritability.  
588 *BMC medical genetics*. 2006;7:74.
- 589 24. Amador C, Huffman J, Trochet H, Campbell A, Porteous D, Generation S, et al. Recent  
590 genomic heritage in Scotland. *BMC Genomics*. 2015;16:437.
- 591 25. Kerr SM, Campbell A, Murphy L, Hayward C, Jackson C, Wain LV, et al. Pedigree and  
592 genotyping quality analyses of over 10,000 DNA samples from the Generation Scotland: Scottish  
593 Family Health Study. *BMC medical genetics*. 2013;14:38.
- 594 26. Barbu MC, Walker RM, Howard DM, Evans KL, Whalley HC, Porteous DJ, et al. Epigenetic  
595 prediction of major depressive disorder. *medRxiv*. 2019:19001123.
- 596 27. Madden RA, McCartney DL, Walker RM, Hillary RF, Bermingham ML, Rawlik K, et al. Birth  
597 weight predicts psychiatric and physical health, cognitive function, and DNA methylation differences  
598 in an adult population. *bioRxiv*. 2019:664045.
- 599 28. Bermingham ML, Walker RM, Marioni RE, Morris SW, Rawlik K, Zeng Y, et al. Identification of  
600 novel differentially methylated sites with potential as clinical predictors of impaired respiratory  
601 function and COPD. *EBioMedicine*. 2019;43:576-86.
- 602 29. Team RC. R: A language and environment for statistical computing. Vienna, Austria: R  
603 Foundation for Statistical Computing; 2019.

- 604 30. Team RC. R: A language and environment for statistical computing. Vienna, Austria: R  
605 Foundation for Statistical Computing; 2020.
- 606 31. Ritchie ME, Phipson B, Wu D, Hu Y, Law CW, Shi W, et al. limma powers differential  
607 expression analyses for RNA-sequencing and microarray studies. *Nucleic Acids Res.* 2015;43(7):e47.
- 608 32. Yang J, Lee SH, Goddard ME, Visscher PM. GCTA: a tool for genome-wide complex trait  
609 analysis. *Am J Hum Genet.* 2011;88(1):76-82.
- 610 33. Saffari A, Silver MJ, Zavattari P, Moi L, Columbano A, Meaburn EL, et al. Estimation of a  
611 significance threshold for epigenome-wide association studies. *Genet Epidemiol.* 2018;42(1):20-33.
- 612 34. Willer CJ, Li Y, Abecasis GR. METAL: fast and efficient meta-analysis of genomewide  
613 association scans. *Bioinformatics.* 2010;26(17):2190-1.
- 614 35. Lenth RV. Least-Squares Means: The R Package lsmeans. *Journal of Statistical Software.*  
615 2016;69(1):1-33.
- 616 36. Suderman M, Staley JR, French R, Arathimos R, Simpkin A, Tilling K. dmrff: identifying  
617 differentially methylated regions efficiently with power and control. *bioRxiv.* 2018:508556.
- 618 37. Phipson B, Maksimovic J, Oshlack A. missMethyl: an R package for analyzing data from  
619 Illumina's HumanMethylation450 platform. *Bioinformatics.* 2016;32(2):286-8.
- 620 38. Tingley D, Yamamoto T, Hirose K, Keele L, Imai K. mediation: R Package for Causal Mediation  
621 Analysis. *Journal of Statistical Software.* 2014;59(5).
- 622 39. McCarthy S, Das S, Kretzschmar W, Delaneau O, Wood AR, Teumer A, et al. A reference  
623 panel of 64,976 haplotypes for genotype imputation. *Nat Genet.* 2016;48(10):1279-83.
- 624 40. Nagy R, Boutin TS, Marten J, Huffman JE, Kerr SM, Campbell A, et al. Exploration of  
625 haplotype research consortium imputation for genome-wide association studies in 20,032  
626 Generation Scotland participants. *Genome Med.* 2017;9(1):23.
- 627 41. Zeng Y, Amador C, Xia C, Marioni R, Sproul D, Walker RM, et al. Parent of origin genetic  
628 effects on methylation in humans are common and influence complex trait variation. *Nat Commun.*  
629 2019;10(1):1383.
- 630 42. Haller T, Kals M, Esko T, Magi R, Fischer K. RegScan: a GWAS tool for quick estimation of  
631 allele effects on continuous traits and their combinations. *Brief Bioinform.* 2015;16(1):39-44.
- 632 43. Buniello A, MacArthur JAL, Cerezo M, Harris LW, Hayhurst J, Malangone C, et al. The NHGRI-  
633 EBI GWAS Catalog of published genome-wide association studies, targeted arrays and summary  
634 statistics 2019. *Nucleic Acids Res.* 2019;47(D1):D1005-D12.
- 635 44. Loh PR, Tucker G, Bulik-Sullivan BK, Vilhjalmsdottir BJ, Finucane HK, Salem RM, et al. Efficient  
636 Bayesian mixed-model analysis increases association power in large cohorts. *Nat Genet.*  
637 2015;47(3):284-90.
- 638 45. Maas SCE, Vidaki A, Wilson R, Teumer A, Liu F, van Meurs JBJ, et al. Validated inference of  
639 smoking habits from blood with a finite DNA methylation marker set. *Eur J Epidemiol.*  
640 2019;34(11):1055-74.

- 641 46. Machiela MJ, Chanock SJ. LDlink: a web-based application for exploring population-specific  
642 haplotype structure and linking correlated alleles of possible functional variants. *Bioinformatics*.  
643 2015;31(21):3555-7.
- 644 47. He L, Kernogitski Y, Kulminskaya I, Loika Y, Arbeev KG, Loiko E, et al. Pleiotropic Meta-  
645 Analyses of Longitudinal Studies Discover Novel Genetic Variants Associated with Age-Related  
646 Diseases. *Front Genet*. 2016;7:179.
- 647 48. Mur J, McCartney DL, Walker RM, Campbell A, Bermingham ML, Morris SW, et al. DNA  
648 methylation in the APOE gene: its link with Alzheimer's and cardiovascular health. *bioRxiv*.  
649 2019:811224.
- 650 49. Zhou X, Chen Y, Mok KY, Kwok TCY, Mok VCT, Guo Q, et al. Non-coding variability at the  
651 APOE locus contributes to the Alzheimer's risk. *Nat Commun*. 2019;10(1):3310.
- 652 50. Burgess BL, Parkinson PF, Racke MM, Hirsch-Reinshagen V, Fan J, Wong C, et al. ABCG1  
653 influences the brain cholesterol biosynthetic pathway but does not affect amyloid precursor protein  
654 or apolipoprotein E metabolism in vivo. *J Lipid Res*. 2008;49(6):1254-67.
- 655 51. Greeve I, Hermans-Borgmeyer I, Brellinger C, Kasper D, Gomez-Isla T, Behl C, et al. The  
656 human DIMINUTO/DWARF1 homolog seladin-1 confers resistance to Alzheimer's disease-associated  
657 neurodegeneration and oxidative stress. *J Neurosci*. 2000;20(19):7345-52.
- 658 52. Martiskainen H, Paldanius KMA, Natunen T, Takalo M, Marttinen M, Leskela S, et al. DHCR24  
659 exerts neuroprotection upon inflammation-induced neuronal death. *J Neuroinflammation*.  
660 2017;14(1):215.
- 661 53. Cramer A, Biondi E, Kuehnle K, Lutjohann D, Thelen KM, Perga S, et al. The role of seladin-  
662 1/DHCR24 in cholesterol biosynthesis, APP processing and Aβ generation in vivo. *EMBO J*.  
663 2006;25(2):432-43.
- 664 54. Picard C, Julien C, Frappier J, Miron J, Theroux L, Dea D, et al. Alterations in cholesterol  
665 metabolism-related genes in sporadic Alzheimer's disease. *Neurobiol Aging*. 2018;66:180 e1- e9.
- 666 55. Braun KVE, Dhana K, de Vries PS, Voortman T, van Meurs JBJ, Uitterlinden AG, et al.  
667 Epigenome-wide association study (EWAS) on lipids: the Rotterdam Study. *Clin Epigenetics*.  
668 2017;9:15.
- 669 56. Pfeiffer L, Wahl S, Pilling LC, Reischl E, Sandling JK, Kunze S, et al. DNA methylation of lipid-  
670 related genes affects blood lipid levels. *Circ Cardiovasc Genet*. 2015;8(2):334-42.
- 671 57. Sayols-Baixeras S, Subirana I, Lluís-Ganella C, Civeira F, Roquer J, Do AN, et al. Identification  
672 and validation of seven new loci showing differential DNA methylation related to serum lipid profile:  
673 an epigenome-wide approach. The REGICOR study. *Hum Mol Genet*. 2016;25(20):4556-65.
- 674 58. Tan CE, Tai ES, Tan CS, Chia KS, Lee J, Chew SK, et al. APOE polymorphism and lipid profile in  
675 three ethnic groups in the Singapore population. *Atherosclerosis*. 2003;170(2):253-60.
- 676 59. Dekkers KF, van Iterson M, Sliker RC, Moed MH, Bonder MJ, van Galen M, et al. Blood lipids  
677 influence DNA methylation in circulating cells. *Genome Biol*. 2016;17(1):138.
- 678 60. Sayols-Baixeras S, Tiwari HK, Aslibekyan SW. Disentangling associations between DNA  
679 methylation and blood lipids: a Mendelian randomization approach. *BMC Proc*. 2018;12(Suppl 9):23.

- 680 61. Smith RG, Pishva E, Shireby G, Smith AR, Roubroeks JAY, Hannon E, et al. Meta-analysis of  
681 epigenome-wide association studies in Alzheimer's disease highlights 220 differentially methylated  
682 loci across cortex. *bioRxiv*. 2020:2020.02.28.957894.
- 683 62. Montagne A, Nation DA, Sagare AP, Barisano G, Sweeney MD, Chakhoyan A, et al. APOE4  
684 leads to blood-brain barrier dysfunction predicting cognitive decline. *Nature*. 2020;581(7806):71-6.
- 685 63. Qi T, Wu Y, Zeng J, Zhang F, Xue A, Jiang L, et al. Identifying gene targets for brain-related  
686 traits using transcriptomic and methylomic data from blood. *Nat Commun*. 2018;9(1):2282.
- 687 64. Morris G, Berk M, Maes M, Puri BK. Could Alzheimer's Disease Originate in the Periphery and  
688 If So How So? *Mol Neurobiol*. 2019;56(1):406-34.
- 689 65. Pluvinage JV, Wyss-Coray T. Systemic factors as mediators of brain homeostasis, ageing and  
690 neurodegeneration. *Nat Rev Neurosci*. 2020.
- 691 66. Liu M, Kuhel DG, Shen L, Hui DY, Woods SC. Apolipoprotein E does not cross the blood-  
692 cerebrospinal fluid barrier, as revealed by an improved technique for sampling CSF from mice. *Am J*  
693 *Physiol Regul Integr Comp Physiol*. 2012;303(9):R903-8.
- 694 67. Gamba P, Testa G, Gargiulo S, Staurengi E, Poli G, Leonarduzzi G. Oxidized cholesterol as  
695 the driving force behind the development of Alzheimer's disease. *Front Aging Neurosci*. 2015;7:119.
- 696 68. Jenner AM, Lim WL, Ng MP, Wenk MR, Shui G, Sharman MJ, et al. The effect of APOE  
697 genotype on brain levels of oxysterols in young and old human APOE epsilon2, epsilon3 and epsilon4  
698 knock-in mice. *Neuroscience*. 2010;169(1):109-15.
- 699 69. Blue EE, Horimoto A, Mukherjee S, Wijsman EM, Thornton TA. Local ancestry at APOE  
700 modifies Alzheimer's disease risk in Caribbean Hispanics. *Alzheimers Dement*. 2019;15(12):1524-32.
- 701 70. Rajabli F, Feliciano BE, Celis K, Hamilton-Nelson KL, Whitehead PL, Adams LD, et al. Ancestral  
702 origin of ApoE epsilon4 Alzheimer disease risk in Puerto Rican and African American populations.  
703 *PLoS Genet*. 2018;14(12):e1007791.

704 **Table 1.** *APOE* ε4 vs. ε2-associated DMPs identified by meta-analysis of the discovery and replication

705 EWASs

| Probe ID   | Gene symbol               | Gene feature *                  | Chr. | BP <sup>†</sup> | Effect <sup>‡</sup> | SE     | P value                   |
|------------|---------------------------|---------------------------------|------|-----------------|---------------------|--------|---------------------------|
| cg13375295 |                           |                                 | 19   | 45344725        | -0.1031             | 0.0049 | 2.80 x 10 <sup>-100</sup> |
| cg06750524 | <i>APOE</i>               | Body                            | 19   | 45409955        | 0.1122              | 0.008  | 1.05 x 10 <sup>-44</sup>  |
| cg16094954 | <i>BCL3</i>               | TSS1500                         | 19   | 45251180        | -0.0994             | 0.0081 | 8.18 x 10 <sup>-35</sup>  |
| cg10762466 |                           |                                 | 19   | 45347693        | -0.0463             | 0.004  | 1.37 x 10 <sup>-30</sup>  |
| cg16471933 | <i>APOE</i>               | Body                            | 19   | 45411802        | 0.0606              | 0.0055 | 7.17 x 10 <sup>-28</sup>  |
| cg10178308 | <i>PVRL2</i>              | TSS200                          | 19   | 45349383        | 0.1075              | 0.0103 | 2.04 x 10 <sup>-25</sup>  |
| cg27087650 | <i>BCL3</i>               | Body                            | 19   | 45255796        | 0.0455              | 0.0044 | 3.77 x 10 <sup>-25</sup>  |
| cg04488858 |                           |                                 | 19   | 45242346        | -0.0514             | 0.0065 | 2.25 x 10 <sup>-15</sup>  |
| cg11643040 | <i>PVRL2</i>              | Body                            | 19   | 45361327        | -0.0278             | 0.0038 | 1.46 x 10 <sup>-13</sup>  |
| cg26631131 |                           |                                 | 19   | 45240591        | 0.0298              | 0.0042 | 2.45 x 10 <sup>-12</sup>  |
| cg17901584 | <i>DHCR24;RP11-67L3.4</i> | TSS1500                         | 1    | 55353706        | -0.0403             | 0.0058 | 3.58 x 10 <sup>-12</sup>  |
| cg06198803 | <i>PVRL2</i>              | Body                            | 19   | 45371896        | -0.041              | 0.006  | 1.04 x 10 <sup>-11</sup>  |
| cg16740586 | <i>ABCG1</i>              | Body                            | 21   | 43655919        | 0.0332              | 0.005  | 3.58 x 10 <sup>-11</sup>  |
| cg03793277 | <i>APOC1</i>              | TSS1500                         | 19   | 45416910        | -0.0304             | 0.0049 | 5.99 x 10 <sup>-10</sup>  |
| cg06500161 | <i>ABCG1</i>              | Body                            | 21   | 43656587        | 0.0247              | 0.0042 | 2.67 x 10 <sup>-9</sup>   |
| cg09555818 | <i>APOC2;APOC4</i>        | 5' UTR;<br>1 <sup>st</sup> exon | 19   | 45449301        | -0.0531             | 0.0091 | 5.77 x 10 <sup>-9</sup>   |
| cg13119609 | <i>APOC2;APOC4</i>        | 5' UTR;<br>1 <sup>st</sup> exon | 19   | 45449297        | -0.0464             | 0.008  | 5.84 x 10 <sup>-9</sup>   |

|            |             |  |    |          |         |        |                       |
|------------|-------------|--|----|----------|---------|--------|-----------------------|
| cg15233575 |             |  | 19 | 45221584 | -0.0223 | 0.0039 | $7.17 \times 10^{-9}$ |
| cg14645843 |             |  | 19 | 45454752 | -0.0346 | 0.0062 | $2.31 \times 10^{-8}$ |
| cg19751789 | <i>LDLR</i> |  | 19 | 11199944 | -0.0338 | 0.0061 | $2.43 \times 10^{-8}$ |

706

707 Abbreviations: BP, base position; Chr., chromosome; SE, standard error; TSS, transcription start site;

708 UTR, untranslated region

709 \* Gene feature: 5' UTR: between the TSS and the ATG; Body: between the ATG and the stop codon;

710 TSS200: within 200 bases 5' of the TSS; TSS1500: within 1500 bases 5' of the TSS.

711 † Base position in genome assembly hg19/GRCh37

712 ‡ Effect direction is relative to carriers of the  $\epsilon 2$  allele

713 **Table 2.** Significant DMRs identified through DMR meta-analysis of the discovery and replication

714 sample EWAS results

| Chr. | Coordinates*          | Gene symbol                                                  | Effect† | SE     | Adj. <i>P</i> value‡    | CpGs                                      |
|------|-----------------------|--------------------------------------------------------------|---------|--------|-------------------------|-------------------------------------------|
| 19   | 45449297-<br>45449301 | <i>APOC2</i> ; <i>APOC4</i>                                  | -0.231  | 0.0364 | 1.63 x 10 <sup>-4</sup> | cg13119609;<br>cg09555818                 |
| 19   | 45449099-<br>45449150 | <i>APOC4</i> -<br><i>APOC2</i> ; <i>APOC2</i> ; <i>APOC4</i> | -0.212  | 0.0356 | 0.00203                 | cg01958934;<br>cg10872931                 |
| 19   | 11199851-<br>11199903 | <i>LDLR</i>                                                  | -0.135  | 0.0245 | 0.0290                  | cg07960944;<br>cg05249393;<br>cg22381454; |
| 22   | 42230879-<br>42230899 | <i>SREBF2</i>                                                | -0.189  | 0.0329 | 0.00755                 | cg15128785;<br>cg12403973                 |
| 22   | 42229983-<br>42230138 | <i>SREBF2</i>                                                | -0.176  | 0.0312 | 0.0118                  | cg09978077;<br>cg16000331                 |
| 19   | 45429771-<br>45429870 | <i>APOC1P1</i>                                               | 0.148   | 0.0269 | 0.0301                  | cg23184690;<br>cg08121984                 |

715

716 Abbreviations: Chr., chromosome; SE, standard error; Adj., adjusted; CpGs, cytosine and guanine

717 nucleotides linked by a phosphate bond

718 \* DMR start and end coordinates in genome assembly hg19/GRCh37

719 † Effect direction is relative to carriers of the ε2 allele

720 ‡ Bonferroni-adjusted *P* value

721 **Table 3.** Top 20 GO terms showing significant enrichment for *APOE* ε4 vs. ε2-associated differentially  
 722 methylated loci

| Ontology category | Term                                             | Proportion * | P-value                  | Genes                                                 |
|-------------------|--------------------------------------------------|--------------|--------------------------|-------------------------------------------------------|
| BP                | cholesterol metabolic process                    | 7/146        | 2.00 x 10 <sup>-11</sup> | <i>DHCR24, APOC1, APOE, LDLR, SQLE, SREBF2, ABCG1</i> |
| BP                | secondary alcohol metabolic process              | 7/156        | 3.59 x 10 <sup>-11</sup> | <i>DHCR24, APOC1, APOE, LDLR, SQLE, SREBF2, ABCG1</i> |
| BP                | chylomicron remnant clearance                    | 4/9          | 4.29 x 10 <sup>-11</sup> | <i>APOC1, APOC2, APOE, LDLR</i>                       |
| BP                | triglyceride-rich lipoprotein particle clearance | 4/9          | 4.29 x 10 <sup>-11</sup> | <i>APOC1, APOC2, APOE, LDLR</i>                       |
| BP                | sterol metabolic process                         | 7/162        | 4.78 x 10 <sup>-11</sup> | <i>DHCR24, APOC1, APOE, LDLR, SQLE, SREBF2, ABCG1</i> |
| BP                | cholesterol homeostasis                          | 6/94         | 7.57 x 10 <sup>-11</sup> | <i>MYLIP, APOC2, APOE, LDLR, SREBF2, ABCG1</i>        |
| BP                | sterol homeostasis                               | 6/94         | 7.57 x 10 <sup>-11</sup> | <i>MYLIP, APOC2, APOE, LDLR, SREBF2, ABCG1</i>        |
| BP                | cholesterol transport                            | 6/98         | 1.04 x 10 <sup>-10</sup> | <i>APOC1, APOC2, APOE, LDLR, SREBF2, ABCG1</i>        |
| BP                | regulation of plasma lipoprotein particle levels | 6/100        | 1.17 x 10 <sup>-10</sup> | <i>MYLIP, APOC1, APOC2, APOE, LDLR, ABCG1</i>         |
| BP                | phospholipid transport                           | 6/90         | 1.27 x 10 <sup>-10</sup> | <i>APOC1, APOC2, APOE, KCNN4, LDLR, ABCG1</i>         |
| BP                | regulation of lipid                              | 7/190        | 1.50 x 10 <sup>-10</sup> | <i>APOC1, APOC2, APOE,</i>                            |



|    |                                              |       |                        |                                                             |
|----|----------------------------------------------|-------|------------------------|-------------------------------------------------------------|
|    | biosynthetic process                         |       | $10^{-10}$             | <i>LDLR, SQLE, SREBF2, ABCG1</i>                            |
| BP | phospholipid efflux                          | 4/12  | $1.50 \times 10^{-10}$ | <i>APOC1, APOC2, APOE, ABCG1</i>                            |
| BP | sterol transport                             | 6/111 | $2.65 \times 10^{-10}$ | <i>APOC1, APOC2, APOE, LDLR, SREBF2, ABCG1</i>              |
| BP | cholesterol efflux                           | 5/56  | $4.60 \times 10^{-10}$ | <i>APOC1, APOC2, APOE, SREBF2, ABCG1</i>                    |
| BP | organophosphate ester transport              | 6/116 | $6.18 \times 10^{-10}$ | <i>APOC1, APOC2, APOE, KCNN4, LDLR, ABCG1</i>               |
| BP | regulation of cholesterol transport          | 5/61  | $6.55 \times 10^{-10}$ | <i>APOC1, APOC2, APOE, SREBF2, ABCG1</i>                    |
| BP | regulation of steroid metabolic process      | 6/123 | $6.67 \times 10^{-10}$ | <i>APOC1, APOE, LDLR, SQLE, SREBF2, ABCG1</i>               |
| BP | regulation of sterol transport               | 5/62  | $7.34 \times 10^{-10}$ | <i>APOC1, APOC2, APOE, SREBF2, ABCG1</i>                    |
| BP | lipid localization                           | 8/407 | $7.54 \times 10^{-10}$ | <i>APOC1, APOC2, APOE, KCNN4, LDLR, SQLE, SREBF2, ABCG1</i> |
| BP | high-density lipoprotein particle remodeling | 4/18  | $1.14 \times 10^{-9}$  | <i>APOC1, APOC2, APOE, ABCG1</i>                            |

723

724 Abbreviations: BP, biological process; CC, cellular component; GO, gene ontology; MF, molecular

725 function

726 \* Number of significant target list-associated Entrez IDs associated with the gene ontology term /total  
727 number of Entrez IDs associated with the GO term. The target list comprised probes that met a  
728 nominal threshold for association with *APOE* ε4 vs. ε2 carrier status of  $P \leq 1 \times 10^{-5}$ .

729 **Figure legends**

730 **Figure 1. Flow chart indicating the analyses carried out in this study.** Yellow boxes indicate datasets  
731 used for the analysis, blue boxes describe the analysis performed and green boxes contain the  
732 results of the analysis. Arrows indicate for which analyses the datasets were used, the order of the  
733 analyses and the results from each analysis.

734 **Figure 2. Manhattan plot showing the *APOE*  $\epsilon 4$  vs.  $\epsilon 2$  carrier EWAS and DMR meta-analyses**  
735 **results.** Each point represents one of the 772,453 loci included in the EWAS meta-analysis, with the  
736 point's position being determined by genomic position (x-axis) and significance in the EWAS meta-  
737 analysis ( $-\log_{10} P$  value; y-axis). Sites attaining genome-wide significance ( $P \leq 3.6 \times 10^{-8}$ ) are indicated  
738 in red and those that are involved in a significant DMR (Bonferroni-correct  $P \leq 0.05$ ) are indicated in  
739 blue. The locations of DMRs are further indicated by vertical blue lines. The solid horizontal line is  
740 the threshold for genome-wide significance ( $P \leq 3.6 \times 10^{-8}$ ).

741 **Figure 3. Circular plot indicating the locations of *APOE*  $\epsilon 4$  vs.  $\epsilon 2$  carrier-associated DMP and DMR**  
742 **CpGs.** The first track shows a chromosome ideogram (hg19/GRCh37). The genomic locations of CpGs  
743 identified as being DMPs or in DMRs identified in *APOE*  $\epsilon 4$  vs.  $\epsilon 2$  carriers are indicated by blue lines  
744 on the second track and the meQTLs associated with these CpGs are indicated by the red lines on  
745 the third track. The connections between CpGs and meQTLs indicate regulatory relationships (*cis*  
746 interactions in red; *trans* interactions in blue). Gene symbols for genes located in each CpG/meQTL-  
747 harbouring region are indicated.

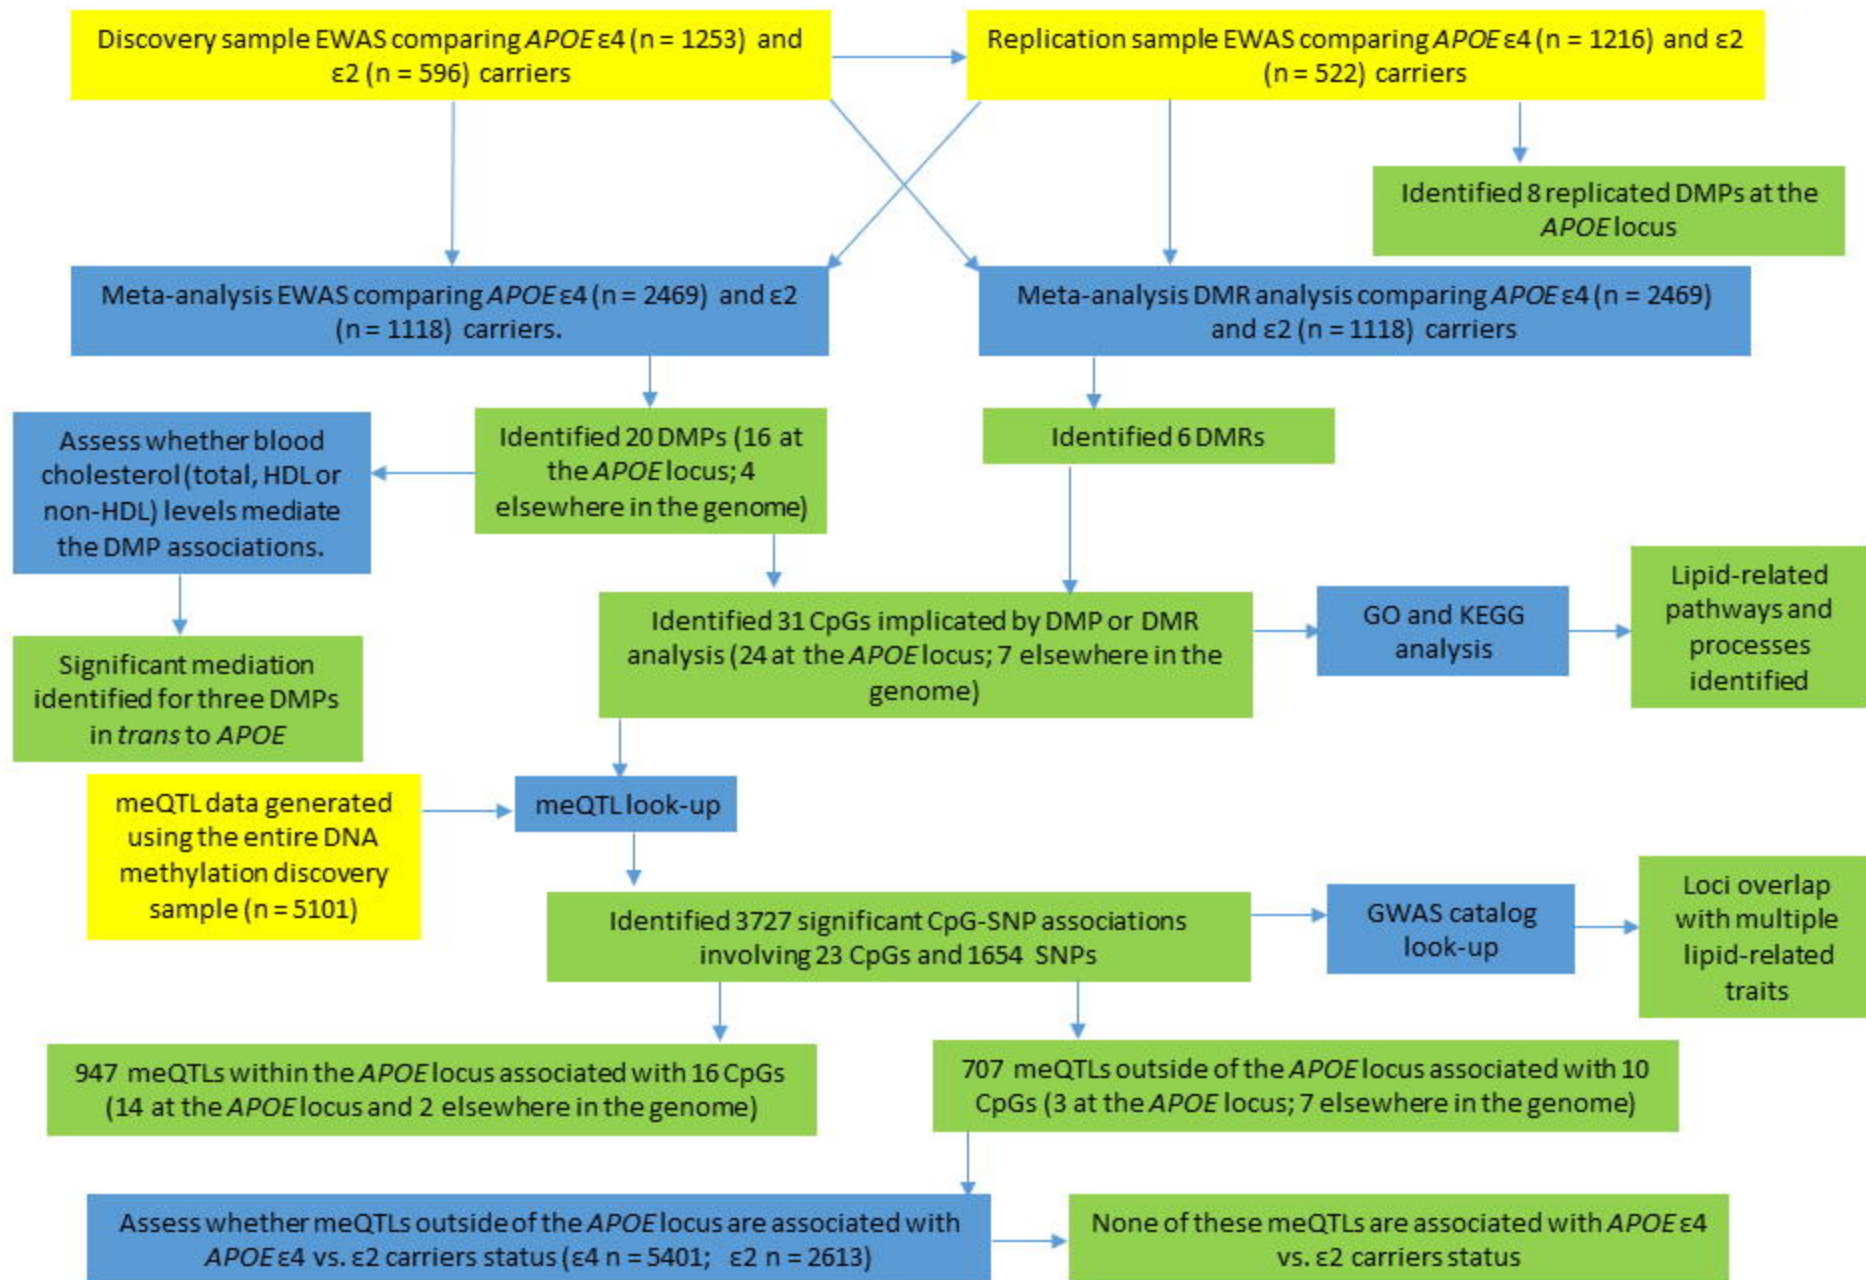

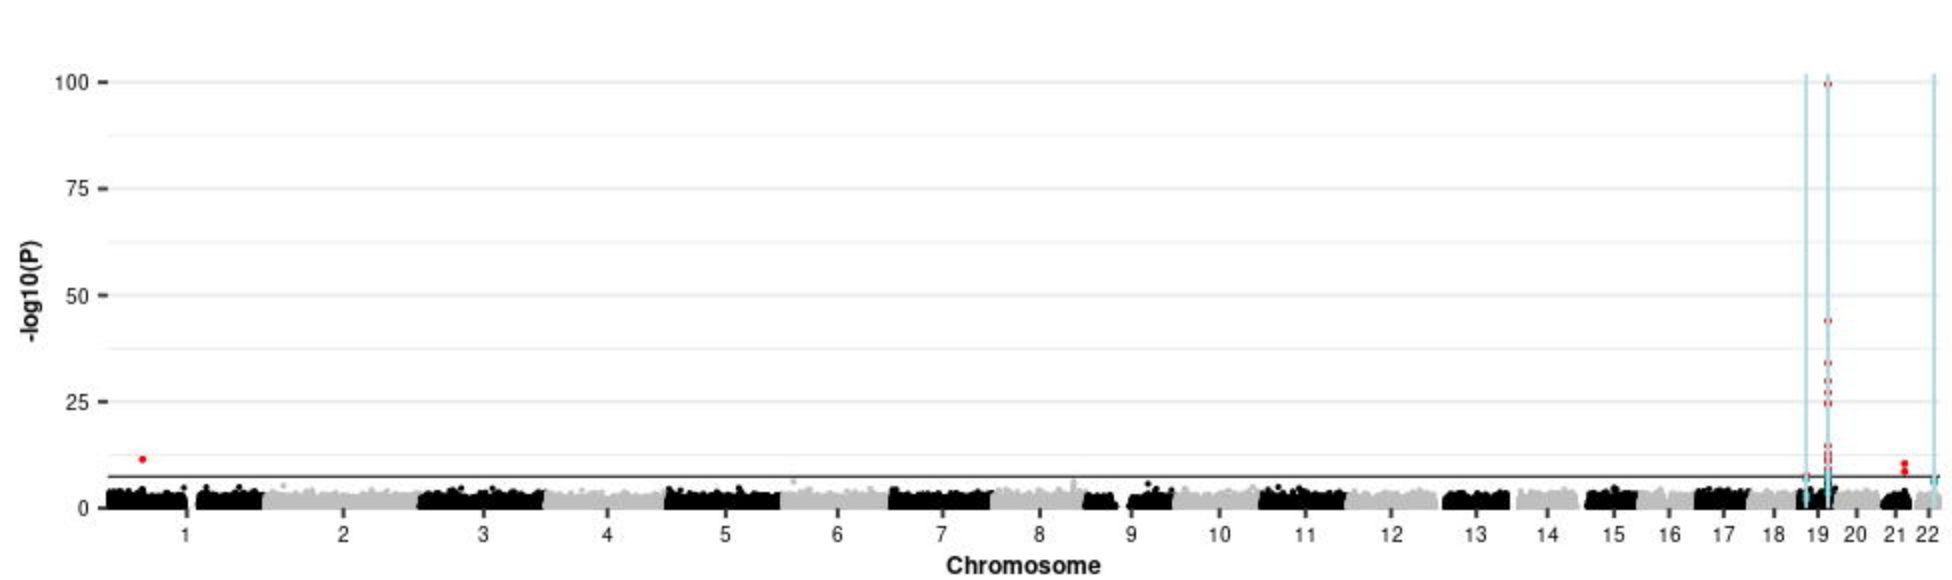

CEACAM20/IGSF23/PVR/CEAM19/CEACAM16/BCL3/  
CBLC/BCAM/PVRL2/TOMM40/APOE/APOC1/APOC4-  
APOC1/CLPTM1/RELB/CLASRP/ZNF296/GEMIN7/PPP  
1/R37/NKPD1/TRAPPC6A/BLOC1S3/EXOC3L2

EP300/L3MBTL2/CHADL/RANCAP1/ZC3H7B/TEF/TOB2/PHF5A/AC  
O2/POLR3H/CSDC2/PMM1/DEI1/XRCC6/NHP2L1/c22orf46/MEI1/  
SREBF2/CCDC134/TNFRSF13C/CENPM/SEPT3/WBP2NL/NAGA/FA  
M109B/SMDT1/NDUFA6/CYP2D2/TCF20

ABCG1

TTC22/LEXM/DHCR24

LDLR

ATP8B4/SLC7A2

LOC731424/MIR945HG/MIR945

SCARB1

CBX5/HNRNPA1/COPZ1

GRAMD1B

C6orf183/LOC100996634/CCDC162P

MYRF/FEN1/TMEM258/FADS1/  
MIR1908/FADS2

INSIG1

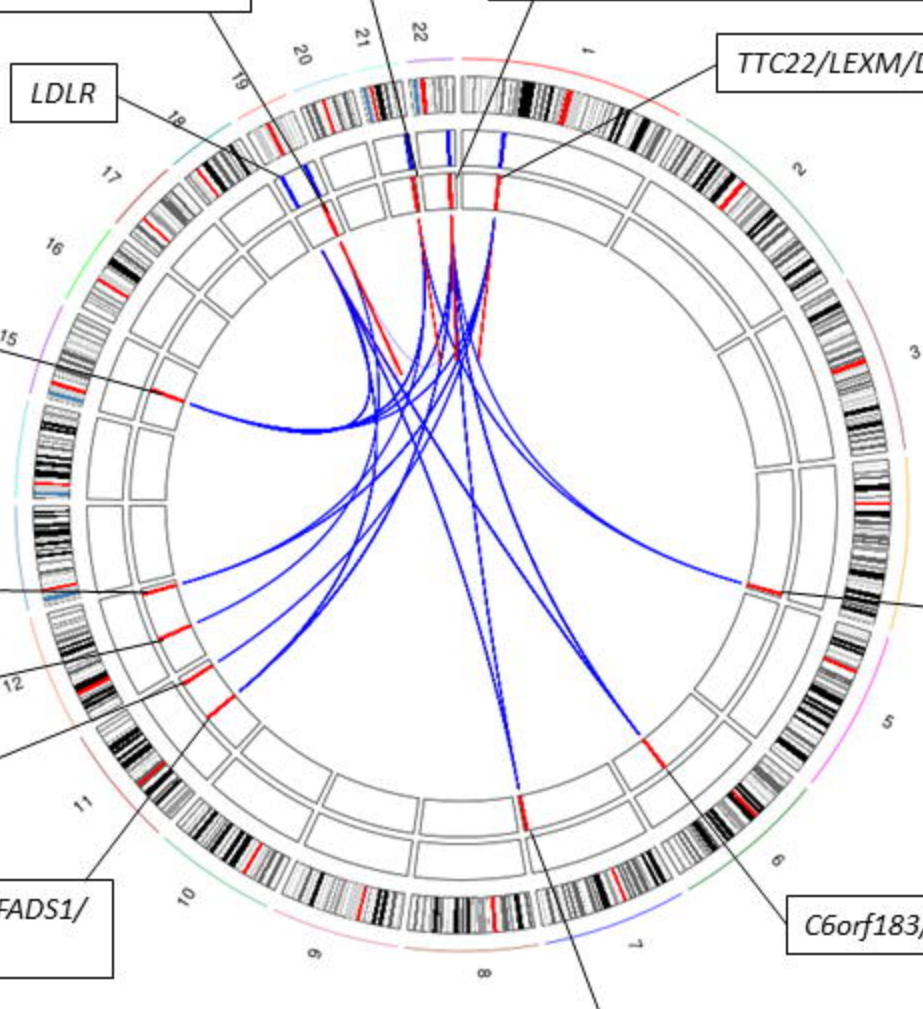

Source: https://www.biorxiv.org/content/biorxiv/early/2020/09/14/815035.full.pdf
